# Supplementary material
Source: bioRxiv or medRxiv preprint supplement (https://www.biorxiv.org/highwire/filestream/70496/field_highwire_adjunct_files/0/231035-1.pdf)
Supplement: Supplementary file [file 231035-1.pdf]

## Supplementary information for:

### Increasing Cas9-mediated homology-directed repair efficiency through covalent tethering of DNA repair template

Eric J. Aird<sup>1,2</sup>, Klaus N. Lovendahl<sup>1,2</sup>, Amber St. Martin<sup>1-3</sup>, Reuben S. Harris<sup>1-4</sup>, and Wendy R. Gordon<sup>1,2\*</sup>

<sup>1</sup>Department of Biochemistry, Molecular Biology, and Biophysics, University of Minnesota, Minneapolis, MN, USA

<sup>2</sup>Center for Genome Engineering, University of Minnesota, Minneapolis, MN, USA

<sup>3</sup>Masonic Cancer Center, Institute for Molecular Virology, University of Minnesota, Minneapolis, MN, USA

<sup>4</sup>Howard Hughes Medical Institute, University of Minnesota, Minneapolis, MN, USA

\*Correspondence should be addressed to W.R.G. ([wrgordon@umn.edu](mailto:wrgordon@umn.edu))

#### **Table of contents:**

Supplementary Figure 1. Assessing Cas9 fusion *in vitro* cleavage activity.

Supplementary Figure 2. Further evidence for robustness of Cas9-PCV fusion.

Supplementary Figure 3. Quantitative PCR data corroborates luminescence readout.

Supplementary Figure 4. Flow cytometry gating methodology.

Supplementary Table 1. Sequences of primers, sgRNA, ssODNs, and proteins.

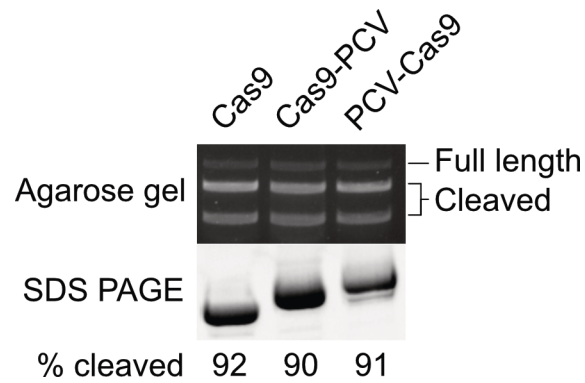

**Supplementary Figure 1. Assessing Cas9 fusion *in vitro* cleavage activity.** GFP-pcDNA3 DNA was linearized and incubated with RNP targeting GFP for 24 hours and electrophoresed on an agarose gel. The equivalent amount of RNP was also analyzed on SDS-PAGE. The percent of DNA cleaved was calculated using densitometry comparing the top band to the middle band.

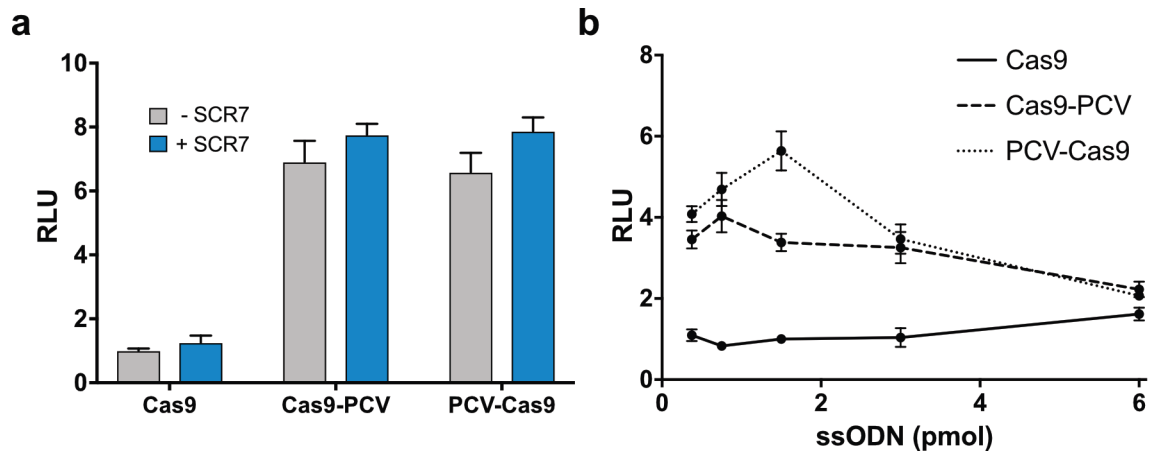

**Supplementary Figure 2. Further evidence for robustness of Cas9-PCV fusion. (a)**

RNP + ssODN containing PCV recognition sequence were transfected with and without the addition of SCR7. 24 hours post-transfection, cells were washed and replenished with fresh media, and luminescence was assayed another 24 hours later. Values

normalized to Cas9 minus SCR7. **(b)** Titration of ssODN while keeping RNP

concentration constant at 1.5 pmol. Values in relative luminescence units (RLU). Data are shown as mean +/- SD (n=3).

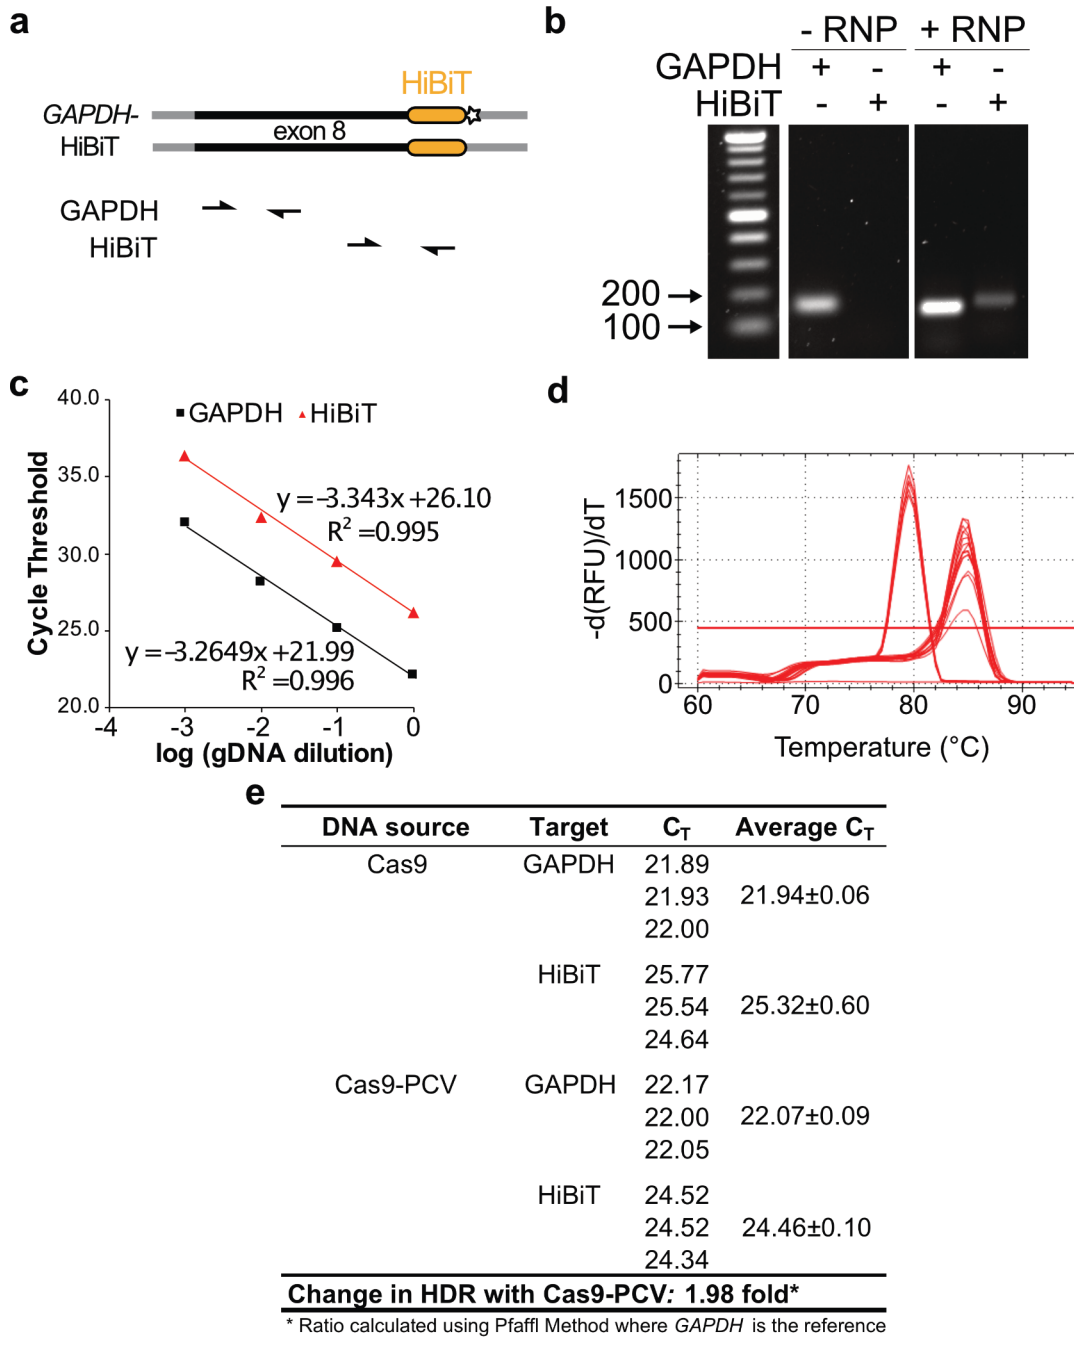

**Supplementary Figure 3. Quantitative PCR data corroborates luminescence**

**readout.** (a) Diagram of PCR primer binding sites at the GAPDH locus. (b) End-point PCR using both primer pairs on unedited (-RNP) and edited (+RNP) cells. Expected amplicon sizes are 130 bp for GAPDH pair and 187 bp for HiBiT pair. (c) Serial dilution

of purified genomic DNA (gDNA) from a pool of edited cells using both primer pairs. Limit of detection is set at 40 cycles. Dynamic range represented by range between first and last values. Best fit line equation shown on graph with corresponding  $R^2$  values. **(d)** Melt curve analysis comparing temperature to change in fluorescence. The first peak corresponds to GAPDH amplicon. **(e)** Calculated cycle threshold values. Relative change in HiBiT amplification is calculated using the Pfaffl method. Primer efficiencies used in calculation determined from (c) were 102% and 99% for GAPDH and HiBiT, respectively.

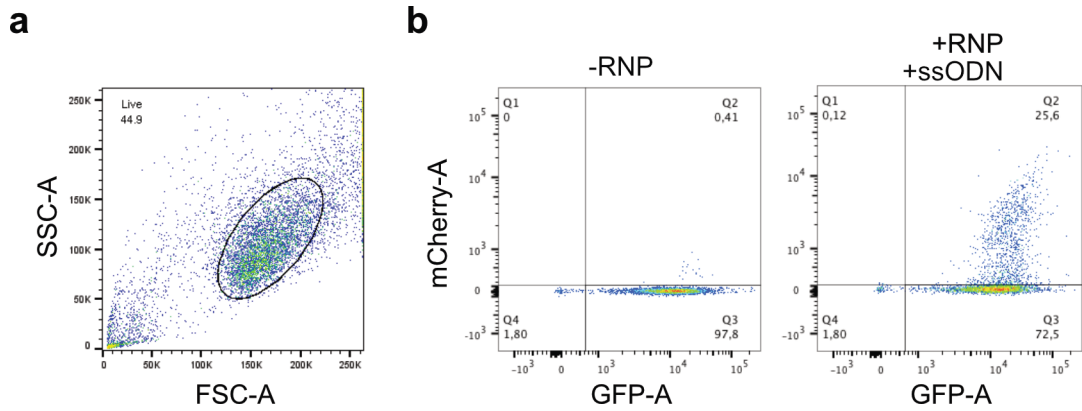

**Supplementary Figure 4. Flow cytometry gating methodology.** (a) Flow cytometry plot of gating used to select live cells based on the forward scatter (FSC) and side scatter (SSC). 10,000 events are measured. (b) Flow cytometry plots of gated live cells comparing GFP intensity to mCherry intensity in transfected (+RNP +ssODN) versus untransfected cells (-RNP). Gating is based on untransfected cells.

**Supplementary Table 1. Sequences of primers, sgRNA, ssODNs, and proteins.**

| <b>Primer</b>       | <b>DNA sequence (5'-to-3')</b>                                                                                                                                                                                                                                                                                                                                                                                                                                                                                                                                                                                                                                                                                                                                                                                                                                                                                                                                                                                                                                                                                                                                                                                                                                                                                                                                                                                                                                                                                                                                                                                                                                                                                                                                                                                                                                                                                                                                                                                                                                                                                                                                                                                                                                                                                                                                                                                                        |
|---------------------|---------------------------------------------------------------------------------------------------------------------------------------------------------------------------------------------------------------------------------------------------------------------------------------------------------------------------------------------------------------------------------------------------------------------------------------------------------------------------------------------------------------------------------------------------------------------------------------------------------------------------------------------------------------------------------------------------------------------------------------------------------------------------------------------------------------------------------------------------------------------------------------------------------------------------------------------------------------------------------------------------------------------------------------------------------------------------------------------------------------------------------------------------------------------------------------------------------------------------------------------------------------------------------------------------------------------------------------------------------------------------------------------------------------------------------------------------------------------------------------------------------------------------------------------------------------------------------------------------------------------------------------------------------------------------------------------------------------------------------------------------------------------------------------------------------------------------------------------------------------------------------------------------------------------------------------------------------------------------------------------------------------------------------------------------------------------------------------------------------------------------------------------------------------------------------------------------------------------------------------------------------------------------------------------------------------------------------------------------------------------------------------------------------------------------------------|
| GAPDH_F             | CTCCACCTTTCTCATCCAAG                                                                                                                                                                                                                                                                                                                                                                                                                                                                                                                                                                                                                                                                                                                                                                                                                                                                                                                                                                                                                                                                                                                                                                                                                                                                                                                                                                                                                                                                                                                                                                                                                                                                                                                                                                                                                                                                                                                                                                                                                                                                                                                                                                                                                                                                                                                                                                                                                  |
| GAPDH_R             | ACATCACCCCTCTACCTCC                                                                                                                                                                                                                                                                                                                                                                                                                                                                                                                                                                                                                                                                                                                                                                                                                                                                                                                                                                                                                                                                                                                                                                                                                                                                                                                                                                                                                                                                                                                                                                                                                                                                                                                                                                                                                                                                                                                                                                                                                                                                                                                                                                                                                                                                                                                                                                                                                   |
| HIBIT_F             | GAGACTGGCTCTTAAAAAGTGC                                                                                                                                                                                                                                                                                                                                                                                                                                                                                                                                                                                                                                                                                                                                                                                                                                                                                                                                                                                                                                                                                                                                                                                                                                                                                                                                                                                                                                                                                                                                                                                                                                                                                                                                                                                                                                                                                                                                                                                                                                                                                                                                                                                                                                                                                                                                                                                                                |
| HiBiT_R             | GCTAATCTTCTTGAACAGCCG                                                                                                                                                                                                                                                                                                                                                                                                                                                                                                                                                                                                                                                                                                                                                                                                                                                                                                                                                                                                                                                                                                                                                                                                                                                                                                                                                                                                                                                                                                                                                                                                                                                                                                                                                                                                                                                                                                                                                                                                                                                                                                                                                                                                                                                                                                                                                                                                                 |
| Cas9-PCV-Y96A_F     | CGATCAGCAGAACAAGAATTTTGTAGCAAAGAAGGCAAC                                                                                                                                                                                                                                                                                                                                                                                                                                                                                                                                                                                                                                                                                                                                                                                                                                                                                                                                                                                                                                                                                                                                                                                                                                                                                                                                                                                                                                                                                                                                                                                                                                                                                                                                                                                                                                                                                                                                                                                                                                                                                                                                                                                                                                                                                                                                                                                               |
| Cas9-PCV-Y96A_R     | GTTGCCTTCTTTGCTACAAAATTTTGTCTGCTGATCG                                                                                                                                                                                                                                                                                                                                                                                                                                                                                                                                                                                                                                                                                                                                                                                                                                                                                                                                                                                                                                                                                                                                                                                                                                                                                                                                                                                                                                                                                                                                                                                                                                                                                                                                                                                                                                                                                                                                                                                                                                                                                                                                                                                                                                                                                                                                                                                                 |
|                     |                                                                                                                                                                                                                                                                                                                                                                                                                                                                                                                                                                                                                                                                                                                                                                                                                                                                                                                                                                                                                                                                                                                                                                                                                                                                                                                                                                                                                                                                                                                                                                                                                                                                                                                                                                                                                                                                                                                                                                                                                                                                                                                                                                                                                                                                                                                                                                                                                                       |
| <b>sgRNA target</b> | <b>RNA sequence (5'-to-3')</b>                                                                                                                                                                                                                                                                                                                                                                                                                                                                                                                                                                                                                                                                                                                                                                                                                                                                                                                                                                                                                                                                                                                                                                                                                                                                                                                                                                                                                                                                                                                                                                                                                                                                                                                                                                                                                                                                                                                                                                                                                                                                                                                                                                                                                                                                                                                                                                                                        |
| GAPDH               | CCTCCAAGGAGTAAGACCCC                                                                                                                                                                                                                                                                                                                                                                                                                                                                                                                                                                                                                                                                                                                                                                                                                                                                                                                                                                                                                                                                                                                                                                                                                                                                                                                                                                                                                                                                                                                                                                                                                                                                                                                                                                                                                                                                                                                                                                                                                                                                                                                                                                                                                                                                                                                                                                                                                  |
| vinculin            | TGAAGAGTTCCTGAGCAGA                                                                                                                                                                                                                                                                                                                                                                                                                                                                                                                                                                                                                                                                                                                                                                                                                                                                                                                                                                                                                                                                                                                                                                                                                                                                                                                                                                                                                                                                                                                                                                                                                                                                                                                                                                                                                                                                                                                                                                                                                                                                                                                                                                                                                                                                                                                                                                                                                   |
| mCherry             | TGGCCCTCACCTTCGCCT                                                                                                                                                                                                                                                                                                                                                                                                                                                                                                                                                                                                                                                                                                                                                                                                                                                                                                                                                                                                                                                                                                                                                                                                                                                                                                                                                                                                                                                                                                                                                                                                                                                                                                                                                                                                                                                                                                                                                                                                                                                                                                                                                                                                                                                                                                                                                                                                                    |
| GFP                 | CTCGTGACCACCTGACCTA                                                                                                                                                                                                                                                                                                                                                                                                                                                                                                                                                                                                                                                                                                                                                                                                                                                                                                                                                                                                                                                                                                                                                                                                                                                                                                                                                                                                                                                                                                                                                                                                                                                                                                                                                                                                                                                                                                                                                                                                                                                                                                                                                                                                                                                                                                                                                                                                                   |
|                     |                                                                                                                                                                                                                                                                                                                                                                                                                                                                                                                                                                                                                                                                                                                                                                                                                                                                                                                                                                                                                                                                                                                                                                                                                                                                                                                                                                                                                                                                                                                                                                                                                                                                                                                                                                                                                                                                                                                                                                                                                                                                                                                                                                                                                                                                                                                                                                                                                                       |
| <b>ssODN</b>        | <b>DNA sequence (5'-to-3')</b>                                                                                                                                                                                                                                                                                                                                                                                                                                                                                                                                                                                                                                                                                                                                                                                                                                                                                                                                                                                                                                                                                                                                                                                                                                                                                                                                                                                                                                                                                                                                                                                                                                                                                                                                                                                                                                                                                                                                                                                                                                                                                                                                                                                                                                                                                                                                                                                                        |
| PCV+ GAPDH          | AAGTATTACCAGCCTCTTCTAGGTATGACAACGAATTTGGCTACAGCAACAGGGTGGTGGACCTCATGGCCACATGG<br>CCTCCAAGGAGGTGAGCGGCTGGCGGCTGTTCAAGAAGATTAGCTAAGACCCCTGGACCACCAGCCCCAGCAAGAG<br>CACAAAGGAAAGAGAGAGACCCTACTGCTGGGGAGTCCCTGCCAC                                                                                                                                                                                                                                                                                                                                                                                                                                                                                                                                                                                                                                                                                                                                                                                                                                                                                                                                                                                                                                                                                                                                                                                                                                                                                                                                                                                                                                                                                                                                                                                                                                                                                                                                                                                                                                                                                                                                                                                                                                                                                                                                                                                                                        |
| PCV- GAPDH          | CTATTGTACTAATCTTCTAGGTATGACAACGAATTTGGCTACAGCAACAGGGTGGTGGACCTCATGGCCACATGG<br>CCTCCAAGGAGGTGAGCGGCTGGCGGCTGTTCAAGAAGATTAGCTAAGACCCCTGGACCACCAGCCCCAGCAAGAG<br>CACAAGAGGAAGAGAGAGACCCTACTGCTGGGGAGTCCCTGCCAC                                                                                                                                                                                                                                                                                                                                                                                                                                                                                                                                                                                                                                                                                                                                                                                                                                                                                                                                                                                                                                                                                                                                                                                                                                                                                                                                                                                                                                                                                                                                                                                                                                                                                                                                                                                                                                                                                                                                                                                                                                                                                                                                                                                                                          |
| PCV vinculin        | AAGTATTACCAGCCTCTTCCCAAACCCACTGCTGCCTGAAGGTGAGGTCCCTCCACCTAGGCTCCACCACCAGAG<br>GAAAAGGATGAAGTGAAGTGAAGTGGCGGCTGTTCAAGAAGATTAGCGAGTTCCTGAGCAGAAGGCCGGGAGGTGA<br>TTAACAGCCAATGATGATGGCTGCCAGACAGCTCCATGATGAA                                                                                                                                                                                                                                                                                                                                                                                                                                                                                                                                                                                                                                                                                                                                                                                                                                                                                                                                                                                                                                                                                                                                                                                                                                                                                                                                                                                                                                                                                                                                                                                                                                                                                                                                                                                                                                                                                                                                                                                                                                                                                                                                                                                                                            |
| PCV mCherry         | AAGTATTACCAGCCGGGCGAGGGCCGCCCTACGAGGGCACCCAGACCAGCTGAAGGTGACCAAGGGTGGC<br>CCCTTACCCTTCGCCTGGGACATCCTGTCCCCTCAGTTCATGTACGGCTCCAAGGCCTACGTGAAGCACC                                                                                                                                                                                                                                                                                                                                                                                                                                                                                                                                                                                                                                                                                                                                                                                                                                                                                                                                                                                                                                                                                                                                                                                                                                                                                                                                                                                                                                                                                                                                                                                                                                                                                                                                                                                                                                                                                                                                                                                                                                                                                                                                                                                                                                                                                      |
|                     |                                                                                                                                                                                                                                                                                                                                                                                                                                                                                                                                                                                                                                                                                                                                                                                                                                                                                                                                                                                                                                                                                                                                                                                                                                                                                                                                                                                                                                                                                                                                                                                                                                                                                                                                                                                                                                                                                                                                                                                                                                                                                                                                                                                                                                                                                                                                                                                                                                       |
| <b>Protein</b>      | <b>Amino acid sequence (N-to-C)</b>                                                                                                                                                                                                                                                                                                                                                                                                                                                                                                                                                                                                                                                                                                                                                                                                                                                                                                                                                                                                                                                                                                                                                                                                                                                                                                                                                                                                                                                                                                                                                                                                                                                                                                                                                                                                                                                                                                                                                                                                                                                                                                                                                                                                                                                                                                                                                                                                   |
| Cas9-PCV            | MDKKYSIGLDIGTNSVGVAVITDEYKVPSSKFKVLGNTDRHSIKKNLIGALLFDSGETAEATRLKRTARRRYTRRKNRICYLQ<br>EIFSNEMAKVDDSFHRLLEESFLVEEDKKHERHPIFGNIVDEVAYHEKYPTIYHLRKKLVDSTDKADLRLIYLALAHMIKFRGH<br>FLIEGDLNPDNSDVKLFIQLVQTYNQLFEENPINASGVDAKAILSARLSKSRRLLENLIAQLPGEKKNLFGNLIALLSLGLTPNF<br>KSNFDLAEDAKLQLSKDYYDDLNLQAIGDQYADLFLAAKNLSDAILLSDILRVNTEITKAPLSASMIKRYDEHHQDLTLLK<br>ALVRQQLPEKYKEIFFDQSKNGYAGYIDGGASQEEFYKFIKPILEKMDGTEELLVKNREDLLRKQRTFDNGSIPHQIHLGEL<br>HAILRRQEDFYFPLKDNREKIEKILFRIPYYVGLARGNSRFAMWTRKSEETITPWNFEVVDKASQSFIERMNTFNDKLN<br>PNEKVLPHKSLLYEYFTVYNELTKVKYVTEGMRKPAFLSGEQKKAIVDLLFKTNRKVTVKQLKEDYFKKIECFDSEISGVED<br>RFNASLGTYHDLKIIKDKDFLDNEENEDILEDIVLTLTFEDREMIEERLKYAHLFDDKVMKQLKRRRYTGWGRLSRKLINGI<br>RDKQSGKTILDFLKSDGFANRFMQLIHDDSLTFKEDIQAQVSGQGDLSLHEHIANLAGSPAIKKGILQTVKVVDELVKVMGR<br>HKPENIVEMARENQTTQKGQKNSRERMKRIEIEGKELGSQLKEHPVENTQLQNEKLYLYLQNGRDMYVDQELDINRLSD<br>YDVHDIVPQSLKDDSDINKVLRSDKNRGSNDVPSSEVVKMKMKNYWRQLLNAKLITQRKFDNLTKAERGGSELNKAAGFI<br>KRQLVETRQITKHVAQILDSRMNTKYDENDKLIREVKVITLKSCLVSDFRKDFQFYKVRINNYHHAHDAYLNAVVG TALIKKY<br>PKLESEFYVDYKVDVRKMIKSEQEI GKATAKYFFYSNIMNFFKTEITLANGEIRKRLIETNGETGEI VWDKGRDFATVRK<br>VLSMPQVNVIVKTEVQTTGGFSKESILPKRNSDKLIARKKDWDPKKYGGFDSPTVAYSVLVVAKVEKGSKLLKSVKELLGITI<br>GSIPIHQIHLGELHAILRRQEDFYFPLKDNREKIEKILFRIPYYVGLARGNSRFAMWTRKSEETITPWNFEVVDKASQSF<br>FIERMNTFNDKLNLPNEKVLPHKSLLYEYFTVYNELTKVKYVTEGMRKPAFLSGEQKKAIVDLLFKTNRKVTVKQLKEDYFKKIE<br>CFDSVEISGVEDRFNASLGTYHDLKIIKDKDFLDNEENEDILEDIVLTLTFEDREMIEERLKYAHLFDDKVMKQLKRRRYT<br>GWGRLSRKLINGIRDKQSGKTILDFLKSDGFANRFMQLIHDDSLTFKEDIQAQVSGQGDLSLHEHIANLAGSPAIKKGILQ<br>TVKVVDELVKVMGRHKPENIVEMARENQTTQKGQKNSRERMKRIEIEGKELGSQLKEHPVENTQLQNEKLYLYLQNGRDM<br>YVDQELDINRLSDYDVHDIVPQSLKDDSDINKVLRSDKNRGSNDVPSSEVVKMKMKNYWRQLLNAKLITQRKFDNLTKA<br>ERGGSELNKAAGFIKRQLVETRQITKHVAQILDSRMNTKYDENDKLIREVKVITLKSCLVSDFRKDFQFYKVRINNYHHAHD<br>AYLNAVVG TALIKKYPKLESEFYVDYKVDVRKMIKSEQEI GKATAKYFFYSNIMNFFKTEITLANGEIRKRLIETNGETGE<br>I VWDKGRDFATVRK VLSMPQVNVIVKTEVQTTGGFSKESILPKRNSDKLIARKKDWDPKKYGGFDSPTVAYSVLVVAKVEK<br>KSKLLKSVKELLGITIMERSSEFEKNPIDFLKAEAGKYEVKDKLIIKLPKYSLFELENGRKRMLASAGELQKGNELALPSKYVNF<br>YLASHYEKLGSPEDNEQKQLFVEQHKHYLDEIIEQISEFSKRVLADANL DKVLSAYNKHRDKPIREQAENIIHLFTLNLGAP<br>AAFYFDTTIDRKRYTSTKEVLDATLIHQSI TGLYETRIDLSQLGGDGGGSGTRLPKKKRKYGGGSGSPSKNGRSGPQPHKRWVFTLNNPSEDE<br>RKKIRDLPISLFDYFIVGEEGNEEGRTPHLQGFANFVKKQTFNKVKWYL GARCHIEKAKGTDQQNKEYCSKEGNLLMECGA<br>PRSQQR* |
| PCV-Cas9            | PSKKNRSGRPQPHKRWVFTLNNPSEDERKKIRDLPISLFDYFIVGEEGNEEGRTPHLQGFANFVKKQTFNKVKWYL GARC<br>HIEKAKGTDQQNKEYCSKEGNLLMECGAPRSQGRLEAAEAKEAAEAKEAAEAKEAAEAKEAAEAKEAAEAKEAAEAKEAAEA<br>APKKKRKVGSSMDKKYSIGLDIGTNSVGVAVITDEYKVPSSKFKVLGNTDRHSIKKNLIGALLFDSGETAEATRLKRTARRRY<br>TRRKNRICYLQEIFSNEMAKVDDSFHRLLEESFLVEEDKKHERHPIFGNIVDEVAYHEKYPTIYHLRKKLVDSTDKADLRLIYL<br>ALAHMIKFRGHFLIEGDLNPDNSDVKLFIQLVQTYNQLFEENPINASGVDAKAILSARLSKSRRLLENLIAQLPGEKKNLFGN<br>LIALLSLGLTPNFKSNFDLAEDAKLQLSKDYYDDLNLQAIGDQYADLFLAAKNLSDAILLSDILRVNTEITKAPLSASMIKRY<br>DEHHQDLTLLKALVRQQLPEKYKEIFFDQSKNGYAGYIDGGASQEEFYKFIKPILEKMDGTEELLVKNREDLLRKQRTFDN<br>GSIPIHQIHLGELHAILRRQEDFYFPLKDNREKIEKILFRIPYYVGLARGNSRFAMWTRKSEETITPWNFEVVDKASQSF<br>FIERMNTFNDKLNLPNEKVLPHKSLLYEYFTVYNELTKVKYVTEGMRKPAFLSGEQKKAIVDLLFKTNRKVTVKQLKEDYFKKIE<br>CFDSVEISGVEDRFNASLGTYHDLKIIKDKDFLDNEENEDILEDIVLTLTFEDREMIEERLKYAHLFDDKVMKQLKRRRYT<br>GWGRLSRKLINGIRDKQSGKTILDFLKSDGFANRFMQLIHDDSLTFKEDIQAQVSGQGDLSLHEHIANLAGSPAIKKGILQ<br>TVKVVDELVKVMGRHKPENIVEMARENQTTQKGQKNSRERMKRIEIEGKELGSQLKEHPVENTQLQNEKLYLYLQNGRDM<br>YVDQELDINRLSDYDVHDIVPQSLKDDSDINKVLRSDKNRGSNDVPSSEVVKMKMKNYWRQLLNAKLITQRKFDNLTKA<br>ERGGSELNKAAGFIKRQLVETRQITKHVAQILDSRMNTKYDENDKLIREVKVITLKSCLVSDFRKDFQFYKVRINNYHHAHD<br>AYLNAVVG TALIKKYPKLESEFYVDYKVDVRKMIKSEQEI GKATAKYFFYSNIMNFFKTEITLANGEIRKRLIETNGETGE<br>I VWDKGRDFATVRK VLSMPQVNVIVKTEVQTTGGFSKESILPKRNSDKLIARKKDWDPKKYGGFDSPTVAYSVLVVAKVEK<br>KSKLLKSVKELLGITIMERSSEFEKNPIDFLKAEAGKYEVKDKLIIKLPKYSLFELENGRKRMLASAGELQKGNELALPSKYVNF<br>YLASHYEKLGSPEDNEQKQLFVEQHKHYLDEIIEQISEFSKRVLADANL DKVLSAYNKHRDKPIREQAENIIHLFTLNLGAP<br>AAFYFDTTIDRKRYTSTKEVLDATLIHQSI TGLYETRIDLSQLGGDGGGSGTRLPKKKRKYGGGSHHHHHH*                                                                                                                                                                                                                                                                                                                                                                                                                                                                                                                                                                                                                                                                                                                                              |
